# Supplementary material
Source: PubMed Central journal article supplement (PMC5971557)
Supplement: JCM.00319-18_zjm999095984s1.pdf [file JCM.00319-18_zjm999095984s1.pdf]

Supplemental Table. Input data for Bayesian latent class modeling analysis.

|                      | Tissue culture | Sonicate fluid culture | Combination <sup>a</sup> | Frequency |
|----------------------|----------------|------------------------|--------------------------|-----------|
| All joints           | +              | +                      | +                        | 65        |
|                      | +              | -                      | +                        | 9         |
|                      | +              | -                      | -                        | 0         |
|                      | -              | +                      | +                        | 11        |
|                      | -              | +                      | -                        | 0         |
|                      | -              | -                      | +                        | 0         |
|                      | -              | -                      | -                        | 144       |
| Hips and knees       | +              | +                      | +                        | 53        |
|                      | +              | -                      | +                        | 5         |
|                      | +              | -                      | -                        | 0         |
|                      | -              | +                      | +                        | 7         |
|                      | -              | +                      | -                        | 0         |
|                      | -              | -                      | +                        | 0         |
|                      | -              | -                      | -                        | 122       |
| Shoulders and elbows | +              | +                      | +                        | 12        |
|                      | +              | -                      | +                        | 4         |
|                      | +              | -                      | -                        | 0         |
|                      | -              | +                      | +                        | 4         |
|                      | -              | +                      | -                        | 0         |
|                      | -              | -                      | +                        | 0         |
|                      | -              | -                      | -                        | 22        |

<sup>a</sup>Includes tissue culture and sonicate fluid culture.
